# Supplementary material
Source: publisher figshare collection journal article supplement (https://tandf.figshare.com/ndownloader/files/13308476)
Supplement: Supplementary file 1 [file 13308476]

Phosphorylation of Oxyethylated Resorcinol and Calix[4]resorcinarene with P(III) Acid Amides

E.М. Gibadullina*, А.R. Kayupov, Yu.К. Voronina, V.V. Syakaev, М.А. Pudovik, А.R. Burilov

Arbuzov Institute of Organic and Physical Chemistry, FRC Kazan Scientific Center of RAS, Arbuzov str. 8, Kazan, 420088 Russian Federation

E-mail: [elmirak@iopc.ru](mailto:elmirak@iopc.ru)

**Supplemental Materials**

**Experimental**

**Х-ray data:**

The X-ray diffraction data for the crystals of **1** were collected on a Smart Apex II automatic diffractometer using graphite monochromated radiation. The structure was solved by direct methods and refined by full-matrix least-squares using the SHELXL971 program. All the non-hydrogen atoms were refined with anisotropic atomic displacement parameters. The figure was made using the program OLEX22. Crystallographic data (excluding structure factors) for the structure reported in this paper have been deposited with the Cambridge Crystallographic Data Center (1844858). The structure of studied compound may be solved in a higher symmetry group C2c, however in this case, the hydrogen atoms of molecules bound by the rotation axis 2, have an unacceptable relative position, so the structure was solved and refined in the group Cc.

Crystal data for **1**: C20H28O8, *M* = 396.42, colorless crystal, monoclinic, space group *Cc*, *Z* = 4, *a* = 20.849(5), *b* = 11.720(3), *c* = 8.659(2)Å, β=111.872(3)°, *V* = 1963.4(9)Å3, calc =1.341 g cm-3, =0.103 mm-1, = 0.71073 Å, *T* = 296(2) K, 7324 reflections collected (*h*, *k*, *l*), 3704 independent (*R*int 0.0345) and 2395 observed reflections [*I* 2 (*I*)], 269 refined parameters, *R* = 0.0462, *wR*2 = 0.1186, max. Residual electron density 0.167 ( -0.177) eÅ-3.

**Table 1.** H-bonds in crystal compound **1**

| H-bond | D - H | H...A | D...A | D - H...A |
| --- | --- | --- | --- | --- |
| O9A-H9A...O9B | 0.72(6) | 2.12(6) | 2.832(11) | 169(7) |
| O9B-H9B...O11A | 0.91(9) | 1.86(9) | 2.769(12) | 175(10) |
| O11A-H11A...O3A | 0.85(8) | 2.46(8) | 2.876(9) | 111(7) |
| O11A-H11A...O11B | 0.85(8) | 2.02(8) | 2.826(9) | 159(8) |
| O11B-H11B...O9A | 0.85(6) | 1.94(6) | 2.732(10) | 153(6) |
|  |  |  |  |  |


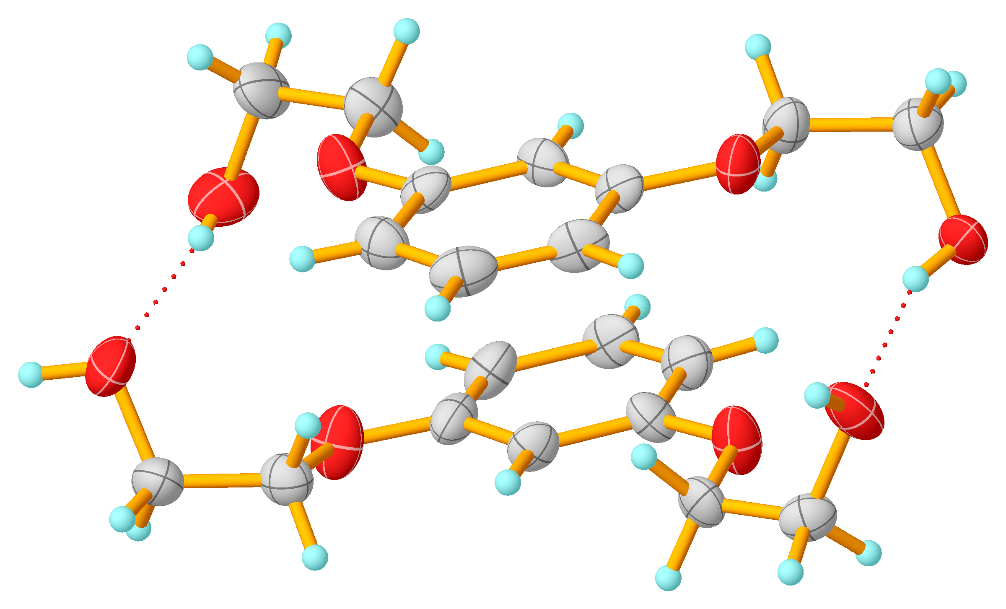


**Figure S 1.** Geometry of two independent molecules and H-dimer in crystal of compound **1**. Ellipsoids are given with 50% probability.

**Materials and measurements**

13С NMR spectra were recorded on a Bruker Avance-600 instrument with the working frequency of 150.5 MHz relative to the residual signals of protons of deuterated solvent (CDCl3). 1Н and 31Р NMR spectra were recorded on a Bruker MSL-400 spectrometer with the working frequency of 400.13 MHz and 161.94 MHz, respectively. Chemical shifts are given relative to the residual signals of deuterated solvents (CDCl3, δ(1H)= 7.27 ppm, δ(13С) = 77.0 ppm; C6D6, δ(1H)= 7.16 ppm, δ(13С) = 128.06 ppm). MALDI-TOF mass spectra were recorded on a ULTRAFLEX III TOF/TOF Bruker instrument (*p*-nitroaniline matrix). IR spectra were recorded on a Vector 22 Fourier spectrometer of Bruker Company in the range of 400-4000 cm-1. Crystal specimens were investigated in KBr pellets. Elemental analysis was carried out on a Carlo-Erba instrument of EA 1108 brand.

The synthesis of 1,3-bis(2-hydroxyethoxy)benzene was carried out according to the procedure from3. Octa-2-hydroxyethylated calix[4]resorcinols were prepared according to the procedure from4. P(III) acid derivatives were synthesized according to known procedures from5.

**Synthesis**

***1,3-Bis[2-(bisdiethylamino)thiophosphoryloxyethoxy]benzene (******2b).*** To the mixture of 1,3-bis(2-hydroxyethoxy)benzene **1** (1 g, 5.05 mmol) and triethylamine (1.02 g, 10.10 mmol) in 10 mL of chloroform, tetraethyldiamidochlorophosphite (2.13 g, 10.10 mmol) in 5 mL of chloroform was added dropwise at 5 ºС, maintained at 5-10 ºС for 30 min, and, then, sulfur (0.33 g, 10.10 mmol) was added; the mixture was maintained for 10 min, the solvent was removed, the residue was dissolved in dioxane, and the precipitated triethylamine hydrochloride was filtered; the solvent was removed from filtrate and dried under vacuum of an oil pump (1 hour, 30 °C, 1 Torr). A total of 2.49 g (81%) of product **2b** was obtained in the form of viscous oil. 1Н NMR (400 MHz, СDCl3), δ, ppm (*J,* Hz): 1.06 (24Н, t, 3*J*HH = 7.17, NСН2С***Н***3,); 3.08 (16Н, m, NСН2); 3.98 (4Н, t, 3*J*НH = 5.12, ОСН2); 4.19 (4Н, m, ОСН2С***Н***2); 6.48-6.50 (3Н, m, H-2,4,6); 7.12 (1Н, t, 3*J*HH =8.19, H-5). 31P NMR (СDCl3), δ, ppm: 79.10. IR, n, cm-1: 792 (P=S), 1593, 1610 (Ar). Found, %: С 50.97; H 8.55; N 9.13, P 10.04, S 10.46. C26H52N4O4P2S2. Calculated, %: С 51.13; H 8.58; N 9.17, P 10.14, S 10.50. MS (MALDI), m/z: 609.45 [M]+, 633.45 [M+Na]+, 649.45 [M+K]+. Calculated, m/z: 610.29.

***O,O'-((1,3-phenylenebis(oxy))bis(ethane-2,1-diyl)) O,O'-dimethyl bis(diethylphosphoramidothioate) (3a).*** To 1,3-bis(2-hydroxyethoxy)benzene **1** (1 g, 5.05 mmol) in 5 mL of chloroform, methoxytetraethyldiamidophosphite (2.08 g, 10.10 mmol) in 3 mL of chloroform was added dropwise. The mixture was heated to 60-70°С and maintained for 16 h, 0.33 g of sulfur was added, the mixture was maintained for 10 min; the solvent was removed and dried in oil-pump vacuum (1 hour, 30 °C, 1 Torr). Product **3a** was obtained in the form of viscous oil. Yield 85%. 1Н NMR (400 MHz, С6D6), δ, ppm (*J,* Hz): 1.02 (12Н, t, 3*J*HH = 6.97, NСН2С***Н***3,); 3.16 (8Н, m, NСН2); 3.49 (6Н, d, 3*J*РH = 13.95, ОСН3); 3.89 (4Н, m, ОСН2); 4.14 (4Н, m, ОСН2С***Н***2); 6.50 (3Н, m, H-2,4,6); 7.10 (1Н, t, 3*J*HH = 8.24, H-5). 13С NMR (150.5 MHz, С6D6), d, ppm (*J,* Hz): 13.37 (q, *J* = 125.70, NСН2***С***Н3); 39.42 (t, *J* = 137.32, N***С***Н2СН3); 51.82 (q, *J* = 146.41, ОСН3); 63.96 (t, *J* = 146.77, СH2OP); 66.16 (t, *J* = 143.50, ArOСH2); 101.18 (d, *J* = 157.67, С-2); 106.45 (d, *J* = 160.94, С-4,6); 129.21 (d, *J* = 159.12, С-5); 159.30 (s, С-1,3). 31P NMR (С6D6), δ, ppm: 77.92. IR, n, cm-1: 793 (P=S), 1583, 1610 (Ar). Found, %: С 45.24; H 7.22; N 5.27, P 11.66, S 12.07. C20H38N2O6P2S2. Calculated, %: С 45.44; H 7.25; N 5.30, P 11.72, S 12.13. MS (MALDI): m/z: 529.28 [M+Н]+, 551.28 [M+Na]+, 567.25 [M+K]+. Calculated, m/z: 528.16.

***O,O'-((1,3-phenylenebis(oxy))bis(ethane-2,1-diyl)) O,O'-diethyl bis(diethylphosphoramidothioate) (3b).***Prepared in analogy with the previous compound from compound **1 (**1 g, 5.05 mmol) and ethoxytetraethyldiamidophosphite (2.23 g, 10.10 mmol). Yield 80%, viscous oil. 1Н NMR (400 MHz, CDCl3), δ, ppm (*J,* Hz): 0.86 (12Н, m, NСН2С***Н***3); 1.05 (6Н, m, ОСН2С***Н***3); 3.18 (8Н, m, NСН2); 3.59 (6Н, m, ОСН2); 4.09-4.31 (8Н, m, ОСН2СН2); 6.44 (3Н, m, H-2,4,6); 7.34 (1Н, t, 3*J*HH = 8.0, H-5). 31P NMR (С6D6), δ, ppm: 76.01. IR, n, cm-1: 792 (P=S), 1583, 1610 (Ar). Found, %: С 47.30; H 7.56; N 5.00, P 11.09, S 11.46. C22H42N2O6P2S2. Calculated, %: С 47.47; H 7.60; N 5.03, P 11.13, S 11.52. MS (MALDI): m/z: 557.23 [M+Н] +, 579.23 [M+Na]+, 595.23 [M+K]+. Calculated, m/z: 556.20.

***O,O'-((1,3-phenylenebis(oxy))bis(ethane-2,1-diyl)) O,O'-diisopropyl bis(diethylphosphoramidothioate) (3c).*** Prepared in analogy with the previous compound from compound **1** (1 g, 5.05 mmol) and *iso*propoxytetraethyldiamidophosphite (2.36 g, 10.10 mmol). Yield 75%, viscous oil. 1Н NMR (400 MHz, CDCl3), δ, ppm (*J,* Hz): 1.03 (12Н, t, 3*J*HH = 6.97, NСН2С***Н***3,); 1.21 (12Н, m, СН(С***Н***3)2); 3.15 (8Н, m, NСН2); 4.08 (2Н, m, С***Н***(СН3)2); 4.17 (4Н, t, 3*J*HH = 7.29, ОСН2); 4.55 (4Н, m, ОСН2С***Н***2); 6.40 (1Н, t, 3*J*HH = 2.03, H-2); 6.45 (2Н, dd, 3*J*HH  = 8.24 H-4,6); 7.08 (1Н, t, 3*J*HH = 8.24, H-5). 13С NMR (CDCl3), d, ppm (*J,* Hz): 14.04 (q, *J*СН = 124.71, NСН2***С***Н3); 23.44 (q, *J*СН = 126.54, СН(***С***Н3)2,); 40.03 (t, *J*СН = 137.18, N***С***Н2СН3); 64.34 (t, *J*СН = 147.45, ArO***С***H2,); 66.94 (t, *J*СН = 144.88, СH2OP); 71.49 (d, *J*СН 146.71, ***С***Н(СН3)2,); 101.89 (d, *J*СН = 157.72, С-2); 107.14 (d, *J*СН = 161.02, С-4,6); 129.86 (d, *J*СН = 158.45, С-5), 159.79 (s, С-1,3). 31P NMR (CDCl3), δ, ppm: 77.86. IR, n, cm-1: 792 (P=S); 1583, 1610 (Ar.). Found, %: С 49.13; H 7.89; N 4.76, P 10.54, S 10.92. C24H46N2O6P2S2. Calculated, %: С 49.30; H 7.93; N 4.79, P 10.59, S 10.97. MS (MALDI): m/z: 585.27 [M+Н]+, 607.27 [M+Na]+, 623.28 [M+K]+. Calculated, m/z: 584.23.

***O,O'-((1,3-phenylenebis(oxy))bis(ethane-2,1-diyl)) O,O'-dibutyl bis(diethylphosphoramidothioate (3d)****.*Prepared in analogy with the previous one from compound **1 (**1 g, 5.05 mmol) and butoxytetraethylamidophosphite (2.51 g, 10.10 mmol). Yield 78%, viscous oil. 1Н NMR (400 MHz, CDCl3), δ, ppm (*J,* Hz): 0.86 (6Н, t, 3*J*HH = 6.96, О(СН2)3С***Н***3,); 1.03 (12Н, t, 3*J*HH = 7.33, NСН2С***Н***3); 1.85 (4Н, m, О(СН2)2С***Н***2СН3); 3.15 (8Н, m, NСН2), 3.58 m (4Н, ОСН2С***Н***2СН2СН3); 3.65 (4Н, m, ОС***Н***2СН2СН2); 4.08-4.19 (8Н, m, ОСН2СН2); 6.40 (1Н, br s, H-2); 6.44 (2Н, d, 3*J*HH = 8.43, H-2,6); 7.08 (1Н, t, 3*J*HH = 8.43, H-5). 13С NMR (CDCl3), d, ppm (*J,* Hz): 13.63 (q, *J*СН = 126.06, NСН2***С***Н3); 18.34 (q, *J*СН = 125.34, О(СН2)3***С***Н3); 28.25 (d, *J*СН = 127.88, ОСН2СН2***С***Н2); 32.86 (t, *J*СН = 137.25, ОСН2***С***Н2СН2СН3); 39.54 (t, *J*СН = 136.96, N***С***Н2СН3); 64.00 (t, *J*СН = 146.41, ArOСH2); 66.40 (t, *J*СН = 144.23, СH2OP); 72.00 (t, *J*СН = 145.68, О***С***Н2СН2СН2); 101.38 (d, *J*СН = 158.03, С-2); 106.64 (d, *J*СН = 161.30, С-4,6); 129.32 (d, *J*СН = 159.12, С-5); 159.26 (s, С-1,3). 31P NMR (CDCl3), δ, ppm: 78.01. IR, n, cm-1: 1299 (P=O), 1583, 1610 (Ar). Found, %: С 50.75; H 8.19; N 4.55, P 10.07, S 10.41. C26H50N2O6P2S2. Calculated, %: С 50.96; H 8.23; N 4.57, P 10.11, S 10.46. MS (MALDI): m/z: 613.26 [M+Н]+, 635.26 [M+Na]+, 651.26 [M+K]+. Calculated, m/z: 612.26.

***4,6,10,12,16,18,22,24-Octakis[2-(bisdiethylamino)thiophosphoryloxyethoxy]-2,8,14,20-tetrapentylpentacyclo[19.3.1.13,7.19,13.115,19]octacosa-1(25), 3,5,7(28),9,11,13(27),15,17,19(26),21,23-dodecaene (8)****.*To the mixture of compound **4** (1.0 g. 0.89 mmol) and triethylamine (0.72 g, 7.14 mmol) in 10 mL of chloroform, tetraethyldiamidochlorophosphite (1.5 g, 7.14 mmol) in 5 mL of chloroform was added dropwise at 5ºС, the mixture was maintained at 5-10ºС for 30 min, sulfur (0.23 g, 7.14 mmol) was added, the mixture was maintained for 10 min; the solvent was removed, the residue was dissolved in dioxane, and precipitated triethylamine hydrochloride was filtered, and solvent was removed from the filtrate and dried under vacuum of an oil pump (1 hour, 30 °C, 1 Torr). Yield 85%, light-yellow resinous product **8**. 1Н NMR (400 MHz, CDCl3), δ, ppm, (*J,* Hz): 0.69 (12Н, br s, СН3); 0.94 (96H, m, NCH2C***H***3); 1.11 (24Н, m, (CH2)3); 1.65 (8Н, m, CH2); 2.94 (32H, m, NC***H***2CH3); 3.80-4.15 (32Н, br m, ОCH2CH2); 4.33 (4Н, br s, СН); 6.39 (4Н, s, Ha); 7.02 (4Н, s, Hb ). 13С NMR (CDCl3), d, ppm (*J*, Hz): 13.87 (q, *J*СН = 125.81, NCH2***С***H3); 13.90 (q, *J*CH =125.89, СH3); 22.56 (t, *J*CH = 125.07, СH2); 27.82 (СH2, t , *J*CH = 125.44); 32.15 (СH2, t, *J*CH = 123.34); 34.39 (СH2, t, *J*CH = 125.07); 35.54 (d, *J*СН = 130.21, СH); 39.89 (t, *J*СН = 136.44, N***C***H2СH3); 62.28 (t *J*СН = 145.98, ArOСH2); 68.19 (t, *J*СН = 141.58, СH2OP); 100.48 (d, *J*СН = 147.25, С-4); 126.05 (d, *J*СН = 153.32, С-7), 127.84 (s, С-2,6); 154.64 (s, С-3,5). 31P NMR (CDCl3), δ, ppm: 79.43. IR s, n, cm-1: 792 (P=S), 1593, 1610 (Ar). Found, %: С 55.24; H 8.98; N 8.05, P 8.91, S 9.21. C128H248N16O16P8S8. Calculated, %: С 55.47; H 9.02; N 8.09, P 8.94, S 9.25. MS (MALDI): m/z: 2794.53 [M+Na]+, 2810.58 [M+K]+ . Calculated, m/z: 2770.48.

***4,6,10,12,16,18,22,24-Octakis[2-(bisdiethylamino)thiophosphoryloxy ethoxy]-2,8,14,20-tetranonylpentacyclo[19.3.1.13,7.19,13.115,19]octacosa-1(25),3, 5,7(28),9,11,13(27),15,17,19(26),21,23-dodecaene (9).*** Prepared in analogy with the previous compound from compound **5** (1.0 g, 0.74 mmol), triethylamine (0.60 g, 5.94 mmol), tetraethyldiamidochlorophosphite (1.25 g, 5.94 mmol), and sulfur (0.20 g, 5.94 mmol). Yield 82%, light-yellow resinous product **9**. 1Н NMR spectrum (CDCl3), δ, ppm, (*J,* Hz): 0.81 (12Н, br s, СН3); 1.06 (96H, m, NCH2C***H***3); 1.18 (56Н, m, (CH2)7); 1.76 (8Н, m, CH2); 3.07 (32H, m, NC***H***2CH3); 3.91-4.26 (32Н, m, ОCH2CH2); 4.44 (4Н, br s, СН); 6.29 (4Н, s, Ha); 7.14 (4Н, s, Hb). 31P NMR (CDCl3), δ, ppm: 78.82. IR, n, cm-1: 794 (P=S), 1593, 1610 (Ar). Found, %: С 57.51; H 9.37; N 7.29, P 8.11, S 8.65. C144H280N16O16P8S8. Calculated, %: С 57.72; H 9.41; N 7.48, P 8.27, S 8.52. MS (MALDI): m/z: 3018.72 [M+Na]+, 3034.68 [M+K]+. Calculated, m/z: 2994.73.

***4,6,16,18-Tetrakis(2-hydroxyethoxy)-10,12,22,24-tetrakis(2–butoxydiethylaminothiophosporyloxyethoxy)-2,8,14,20-tetrapentylpentacyclo[19.3. 1.13,7.19,13.115,19]octacosa-1(25),3,5,7(28),9,11,13(27),15,17,19(26),21,23-dodecaene (10).*** To the mixture of compound **4** (1.0 g, 0.89 mmol) in 10 mL of chloroform, butoxytetraethyldiamidophosphite (0.74 g, 3.57 mmol) in 3 mL of chloroform was added dropwise. The mixture was heated to 70°С and maintained for 16 h; then, sulfur (0.12 g, 3.57 mmol) was added and the mixture was maintained for 10 min; the solvent was removed and the residue was washed with ethanol and dried in oil-pump vacuum (1 hour, 30 °C, 1 Torr). Yield 80%, light-yellow viscous oil. 1Н NMR (400 MHz, CDCl3), δ, ppm, (*J,* Hz): 0.73 (12Н, br s ,СН3); 0.81 (48H, m, NCH2C***H***3); 0.99 (12Н, br s, ОСН2СН2СН2С***Н***3); 1.18 (24Н, m, (CH2)3); 1.69 (8Н, m, CH2); 1.80 (8Н, m, ОСН2СН2С***Н***2СН3); 3.11 (16H, m, NC***H***2CH3); 3.53 (8Н, m, ОСН2С***Н***2СН2СН3); 3.60 (8Н, m, ОС***Н***2СН2СН2СН3); 3.95 (32Н, m, ОCH2CH2); 4.41 (4Н, br s, СН); 6.24 (4Н, s, Ha); 7.10 (4Н, s, Hb). 31P NMR (CDCl3), δ, ppm: 76.48. IR, ν, cm-1: 795 (P=S), 1583, 1610 (Ar). Found, %: С 58.84; H 8.57; N 2.77, P 6.30, S 6.56. C96H168N4O20P4S4. Calculated, %: С 59.07; H 8.62; N 2.79, P 6.35, S 6.58.

***4,6,16,18-Tetrakis(2-acetoxyethoxy)-10,12,22,24-Tetrakis(2-butoxy diethylaminothiophosphoryloxyethoxy)-2,8,14,20-tetrapentylpentacyclo[19.3. 1.13,7.19,13.115,19]octacosa-1(25),3,5,7(28),9,11,13(27),15,17,19(26),21,23-dodecaene (11).*** To compound **11** (0.5 g, 0.25 mmol), a total of 3 mL of acetic anhydride was added. The reaction mixture was refluxed for 12 h. Excess of acetic anhydride was removed in vacuum of water-jet pump and dried in oil-pump vacuum (2 hour, 30 °C, 1 Torr). Yield 95%, light-yellow resin. 1Н NMR (400MHz, CDCl3), δ, ppm, (*J,* Hz): 0.84 (12Н, br s, СН3), 0.93 (24Н, m, ОСН2СН2СН2С***Н***3); 1.10 (24H, t, 3*J*НН =6.96, NCH2C***H***3); 1.28 (24Н, m, (CH2)3); 1.40 (16Н, m, ОСН2СН2С***Н***2СН3); 1.62 (4Н, m, ОСН2С***Н***2СН2СН3); 1.80 (8Н, br s, CH2); 2.06 (12Н, s, С(О)СН3); 3.09 (16H, m, NC***H***2CH3); 3.90 (4Н, m, ОС***Н***2СН2СН2СН3); 3.94-4.15 (32Н, m, ОCH2CH2); 4.48 (4Н, t, 3*J*НН = 7.33, СН); 6.26 (8Н, br s, Ha, Hb). 13С NMR (CDCl3), d, ppm (*J*, Hz): 13.71 (q,*J*CH =124.71, СH3); 14.15 (q, , *J*СН = 125.81, NCH2***С***H3); 14.24 (q, *J*СН = 126.17, ОСН2СН2СН2***С***Н3); 19.00 (t, *J*СН = 125.81, ОСН2СН2***С***Н2СН3); 20.84 (q, *J*СН = 129.84, С(О)***С***Н3); 22.73 (t, *J*CH =124.87, СH2); 27.84 (t, *J*CH = 125.81, СH2); 32.23 (t, *J*CH = 125.07, СH2); 32.29 (t, *J*СН = 125.12, ОСН2***С***Н2СН2СН3); 34.60 (t, *J*CH = 126.17, СH2); 35.55 (d, *J*СН = 130.58, СH); 40.13 (t, *J*СН = 136.71, N***C***H2СH3); 62.46 (t, *J*СН = 146.71, ArOСH2); 63.10 (t, *J*СН = 146.71, О***С***Н2СН2СН2СН3); 64.73 (t, *J*СН = 145.61, ArOСH2); 66.25 (t, *J*СН = 145.61, СH2OP); 66.97 (t, *J*СН = 142.68, ***С***H2OС); 99.74 (d, *J*СН = 146.97, С-4); 116.37 (s, С-); 126.44 (d, *J*СН = 153.68, С-7); 127.33 (s, С-2,6); 154.76 (s, С-3,5); 170.88 (С=О). 31P NMR (CDCl3), δ, ppm: 76.56. IR, ν, cm-1 : 795 (P=S), 1583, 1610 (arom.), 1740 (С=О). Found, %: С 58.72; H 8.34; N 2.61, P 5.82, S 6.02. C104H176N4O24P4S4. Calculated, %: С 58.96; H 8.37; N 2.64, P 5.85, S 6.05. MS (MALDI): m/z: 2141.12 [M+Na]+, 2157.33 [M+K]+. Calculated, m/z: 2118.05.

**Figure S 2**: 1H NMR spectrum of 1,3-Bis[2-(bisdiethylamino)thiophosphoryloxyethoxy]benzene (2b)

**Figure S 3:** 1H NMR spectrum of O,O'-((1,3-phenylenebis(oxy))bis(ethane-2,1-diyl)) O,O'-dimethyl bis(diethylphosphoramidothioate) (3a)

**Figure S 4:** 13C NMR spectrum of O,O'-((1,3-phenylenebis(oxy))bis(ethane-2,1-diyl)) O,O'-dimethyl bis(diethylphosphoramidothioate) (3a)

**Figure S 5**: 1H NMR spectrum of O,O'-((1,3-phenylenebis(oxy))bis(ethane-2,1-diyl)) O,O'-diethyl bis(diethylphosphoramidothioate) (3b)

**Figure S 6**: 1H NMR spectrum of O,O'-((1,3-phenylenebis(oxy))bis(ethane-2,1-diyl)) O,O'-diisopropyl bis(diethylphosphoramidothioate) (3c)

**Figure S 7**: 13C NMR spectrum of O,O'-((1,3-phenylenebis(oxy))bis(ethane-2,1-diyl)) O,O'-diisopropyl bis(diethylphosphoramidothioate) (3c)

**Figure S 8**: 1H NMR spectrum of O,O'-((1,3-phenylenebis(oxy))bis(ethane-2,1-diyl)) O,O'-dibutyl bis(diethylphosphoramidothioate) (3d)

**Figure S 9**: 13C NMR spectrum of O,O'-((1,3-phenylenebis(oxy))bis(ethane-2,1-diyl)) O,O'-dibutyl bis(diethylphosphoramidothioate) (3d)

**Figure S 10**: 1H NMR spectrum of 4,6,10,12,16,18,22,24-Octakis[2-(bisdiethylamino)thiophosphoryloxyethoxy]-2,8,14,20-tetrapentylpentacyclo [19.3.1.13,7.19,13.115,19]octacosa-1(25), 3,5,7(28),9,11,13(27),15,17,19(26),21,23-dodecaene (8)

**Figure S 11**: 13C NMR spectrum of 4,6,10,12,16,18,22,24-Octakis[2-(bisdiethylamino)thiophosphoryloxyethoxy]-2,8,14,20-tetrapentylpentacyclo [19.3.1.13,7.19,13.115,19]octacosa-1(25), 3,5,7(28),9,11,13(27),15,17,19(26),21,23-dodecaene (8)

**Figure S 12**: 1H NMR spectrum of 4,6,10,12,16,18,22,24-Octakis[2-(bisdiethylamino)thiophosphoryloxy ethoxy]-2,8,14,20-tetranonylpentacyclo[19.3.1.13,7.19,13.115,19]octacosa-1(25),3, 5,7(28),9,11,13(27),15,17,19(26),21,23-dodecaene (9)

**Figure S 13**: 1H NMR spectrum of 4,6,16,18-Tetrakis(2-hydroxyethoxy)-10,12,22,24-tetrakis(2–butoxydiethylaminothiophosporyloxyethoxy)-2,8,14,20-tetrapentylpentacyclo[19.3. 1.13,7.19,13.115,19]octacosa-1(25),3,5,7(28),9,11,13(27),15,17,19(26),21,23-dodecaene (10)

**Figure S 14**: 1H NMR spectrum of 4,6,16,18-Tetrakis(2-acetoxyethoxy)-10,12,22,24-Tetrakis(2-butoxy diethylaminothiophosphoryloxyethoxy)-2,8,14,20-tetrapentylpentacyclo[19.3. 1.13,7.19,13.115,19]octacosa-1(25),3,5,7(28),9,11,13(27),15,17,19(26),21,23-dodecaene (11)

**HSQC**

**Figure S 15**: ***13C, 13C {1H}, HMBC, HSQC*** NMR spectrum of 4,6,16,18-Tetrakis(2-acetoxyethoxy)-10,12,22,24-Tetrakis(2-butoxy diethylaminothiophosphoryloxyethoxy)-2,8,14,20-tetrapentylpentacyclo[19.3. 1.13,7.19,13.115,19]octacosa-1(25),3,5,7(28),9,11,13(27),15,17,19(26),21,23-dodecaene (11)

**References**

1. Sheldrick, G.M. *SHELX-97 (Release 97-2). Programs for Crystal Structure Analysis*; University of Gottingen: Germany, **1997**.
2. Dolomanov, O. V.; Bourhis, L. J.; Gildea, R. J.; Howard, J. A. K.; Puschmann, H. *J. Appl. Cryst.* **2009**, *42*, 339-341. DOI: 10.1107/S0021889808042726.
3. Ashton, P. R.; Chemina, A.; Claessensa, C. G.; Menzerb S.; Stoddart, J. F.; White, A. J. P.; Williams, D. J. *Eur. J. Org. Chem.* **1998**, *1998*, 969-981. DOI: 10.1002/(SICI)1099-0690(199806)1998:6<969::AID-EJOC969>3.0.CO;2-G.
4. Pashirova, T. N.; Gibadullina, E. M.; Burilov, A. R.; Kashapov, R. R.; Zhiltsova, E. P.; Syakaev, V. V.; Habicher, W. D., Rummeli, M. H.; Latypov, Sh. K.; Konovalov, A. I.; et al. *RSC Adv*. **2014**. Vol. *4*. 9912-9919. DOI: 10.1039/C3RA46146G.
